# Supplementary material for: Autobiographical emotional induction in older people through popular songs: Effect of reminiscence bump and enculturation
Source: PLoS One. 2020 Sep 2;15(9):e0238434. doi: 10.1371/journal.pone.0238434 (PMC7467226; doi:10.1371/journal.pone.0238434)
Supplement: S3 Appendix — (XLSX) [file pone.0238434.s008.xlsx]

## Sheet: Base_Datos_Estudio3
N	Age	PANAS_PRE_PA	PANAS_PRE_NA	PANAS_POST_PA	PANAS_POST_NA	Total_Familiarity	Familiarity_RB	Familiarity_NoRB	Familiarity_NAT	Familiarity_INT	Familiarity_RB_INT	Familiarity_RB_NAT	Familiarity_NoRB_NAT	Familiarity_NoRB_INT	Total_Valence	Valence_RB	Valence_NoRB	Valence_NAT	Valence_INT	Valence_RB_NAT	Valence_RB_INT	Valence_NoRB_NAT	Valence_NoRB_INT	Total_Arousal	Arousal_RB	Arousal_NoRB	Arousal_NAT	Arousal_INT	Arousal_RB_NAT	Arousal_RB_INT	Arousal_NoRB_NAT	Arousal_NoRB_INT	Total_Memory	Total_Memory_PERCENTAGE	Total_Memory_RB	Total_Memory_NoRB	Total_Memory_NAT	Total_Memory_INT	Total memory_RBNAC	Total memory_RBNAC_PERCENTAGE	Total memory_NORBNAC	Total memory_NORBNAC_PERCENTAGE	Total memory_RBINT	Total memory_RBINT_PERCENTAGE	Total memory_NORBINT	Total memory_NORBINT_PERCENTAGE	Specificity	Specificity_PERCENTAGE	Specificity_RB
1	66	3.2	1.5	3.1	1.3	2.8	3	2.6	2.9	2.7	3	3	2.8	2.4	8.2	8.6	7.8	8.6	7.8	8.6	8.6	8.6	7	6.1	6.2	6	5.8	6.4	5.8	6.6	5.8	6.2	16	80	10	6	9	7	5	100	4	80	5	100	2	40	1	5	1
2	67	2.8	1.2	3.3	1	2.25	2.8	1.7	2.7	1.8	2.6	3	2.4	1	7.4	8.5	6.3	8.2	6.6	8.8	8.2	7.6	5	5	4.6	5.4	5.7	4.3	5.6	3.6	5.8	5	7	35	6	1	4	3	3	60	1	20	3	60	0	0	6	30	5
3	62	3.2	1.1	4	1	2.05	2.2	1.9	2.5	1.6	1.8	2.6	2.4	1.4	6.05	6.1	6	6.4	5.7	6.4	5.8	6.4	5.6	4.35	4.2	4.5	4.8	3.9	4.6	3.8	5	4	9	45	5	4	8	1	4	80	4	80	1	20	0	0	0	0	0
4	73	4	1.6	4.3	1.2	2.9	2.9	2.9	3	2.8	2.8	3	3	2.8	8.75	8.9	8.6	9	8.5	9	8.8	9	8.2	6.6	6.6	6.6	6.6	6.6	7.4	5.8	5.8	7.4	14	70	6	8	8	6	3	60	5	100	3	60	3	60	0	0	0
5	71	3.2	1.7	3.5	1.5	1.85	2.1	1.6	2.1	1.6	2	2.2	2	1.2	6.25	6.7	5.8	6.4	6.1	6.6	6.8	6.2	5.4	5.8	6.1	5.5	5.6	6	5.8	6.4	5.4	5.6	10	50	6	4	6	4	3	60	3	60	3	60	1	20	1	5	1
6	68	2.4	1.5	2.8	1	1.9	2.4	1.4	2.2	1.6	2	2.8	1.6	1.2	6.1	6.7	5.5	7	5.2	8	5.4	6	5	6.05	6.6	5.5	6.8	5.3	7.6	5.6	6	5	7	35	6	1	5	2	5	100	0	0	1	20	1	20	3	15	3
7	72	4	2	4.1	1.6	2.15	2.3	2	2.4	1.9	2	2.6	2.2	1.8	6.2	6.8	5.6	6.4	6	7	6.6	5.8	5.4	3.8	3.4	4.2	4	3.6	4	2.8	4	4.4	9	45	7	2	5	4	4	80	1	20	3	60	1	20	2	10	2
8	66	4.4	1	3.5	1	2.75	3	2.5	2.9	2.6	3	3	2.8	2.2	7.05	7.2	6.9	7.3	6.8	7.6	6.8	7	6.8	1	1	1	1	1	1	1	1	1	11	55	8	3	7	4	5	100	2	40	3	60	1	20	6	30	4
9	67	4.1	1.9	4.2	1.2	2.5	2.9	2.1	2.7	2.3	2.8	3	2.4	1.8	6.95	8.3	5.6	6.9	7	7.8	8.8	6	5.2	5.8	6.4	5.2	6	5.6	6.4	6.4	5.6	4.8	14	70	10	4	8	6	5	100	3	60	5	100	1	20	4	20	4
10	72	4	1	4.4	1	2.75	2.8	2.7	2.6	2.9	3	2.6	2.6	2.8	7.8	8	7.6	7.6	8	7.6	8.4	7.6	7.6	4.65	4.3	5	4	5.3	4.8	3.8	3.2	6.8	17	85	10	7	8	9	5	100	3	60	5	100	4	80	6	30	4
11	67	4.1	1.2	4.7	1	2.8	3	2.6	2.9	2.7	3	3	2.8	2.4	7.35	8.1	6.6	6.7	8	7.2	9	6.2	7	3.6	3	4.2	3.8	3.4	3.2	2.8	4.4	4	10	50	6	4	5	5	4	80	1	20	2	40	3	60	2	10	2
12	66	3.2	2.7	3.3	1.8	2.5	2.9	2.1	2.6	2.4	2.8	3	2.2	2	6.7	7.1	6.3	6.9	6.5	7.4	6.8	6.4	6.2	5.95	5.8	6.1	6.5	5.4	6.8	4.8	6.2	6	19	95	10	9	10	9	5	100	5	100	5	100	4	80	10	50	6
13	72	3	1.8	1.7	1.5	2.4	2.6	2.2	2.4	2.4	2.8	2.4	2.4	2	5.45	6.1	4.8	5.4	5.5	5.8	6.4	5	4.6	5.15	5.8	4.5	5.1	5.2	5.8	5.8	4.4	4.6	6	30	3	3	4	2	2	40	2	40	1	20	1	20	1	5	1
14	69	2.8	1	2.9	1.1	2.2	2.3	2.1	2.5	1.9	2	2.6	2.4	1.8	7.1	7.6	6.6	8	6.2	7.8	7.4	8.2	5	5.05	5.1	5	5.3	4.8	5.6	4.6	5	5	9	45	5	4	7	2	3	60	4	80	2	40	0	0	5	25	2
15	70	4.5	1.8	4.7	1.1	2.65	3	2.3	2.8	2.5	3	3	2.6	2	8.15	9	7.3	8.2	8.1	9	9	7.4	7.2	4.75	3.2	6.3	4.7	4.8	3.8	2.6	5.6	7	14	70	10	4	7	7	5	100	2	40	5	100	2	40	5	25	4
16	64	3	1.2	5	1	2.8	2.8	2.8	3	2.6	2.6	3	3	2.6	8.45	8.5	8.4	8.4	8.5	8	9	8.8	8	7.55	7.6	7.5	7.6	7.5	6.6	8.6	8.6	6.4	14	70	7	7	8	6	4	80	4	80	3	60	3	60	2	10	1
17	62	4.3	1	4.4	1.1	2.55	2.6	2.5	2.8	2.3	2.4	2.8	2.8	2.2	8.25	8.6	7.9	8.3	8.2	8.6	8.6	8	7.8	2.3	2	2.6	2.1	2.5	1.6	2.4	2.6	2.6	5	25	4	1	4	1	3	60	1	20	1	20	0	0	2	10	2
18	71	3.4	2.2	4.4	1.5	2	2.1	1.9	2.2	1.8	2	2.2	2.2	1.6	7.55	8.2	6.9	7.9	7.2	8.2	8.2	7.6	6.2	5.95	6.3	5.6	6.3	5.6	6.4	6.2	6.2	5	14	70	10	4	7	7	5	100	2	40	5	100	2	40	5	25	3
19	68	3.7	1.4	3.4	1.1	2.5	2.6	2.4	2.7	2.3	2.4	2.8	2.6	2.2	7.35	7.7	7	8.3	6.4	8.6	6.8	8	6	2.1	1.9	2.3	1.5	2.7	1.6	2.2	1.4	3.2	11	55	7	4	8	3	5	100	3	60	2	40	1	20	3	15	2
20	70	3.4	1.9	3.6	1	1.8	2.1	1.5	2.2	1.4	1.6	2.6	1.8	1.2	6.2	6.9	5.5	7.6	4.8	8	5.8	7.2	3.8	5.2	5.7	4.7	6.3	4.1	6.8	4.6	5.8	3.6	9	45	6	3	8	1	5	100	3	60	1	20	0	0	0	0	0
21	64	3.9	2	5	1.1	2.75	2.7	2.8	3	2.5	2.4	3	3	2.6	7.85	7.8	7.9	7.9	7.8	7.2	8.4	8.6	7.2	7.2	7.7	6.7	7.2	7.2	7	8.4	7.4	6	16	80	8	8	10	6	5	100	5	100	3	60	3	60	5	25	3
22	62	3.9	1.2	4.1	1.2	2.2	2.3	2.1	2.4	2	2.2	2.4	2.4	1.8	6.25	6.3	6.2	6.1	6.4	6	6.6	6.2	6.2	4.85	4.8	4.9	4.4	5.3	4.2	5.4	4.6	5.2	10	50	6	4	7	3	4	80	3	60	2	40	1	20	3	15	1
23	65	3	1.9	2.3	1.6	2.2	2.4	2	2.5	1.9	1.8	3	2	2	6.85	7.1	6.6	7.5	6.2	8.2	6	6.8	6.4	5.65	5.7	5.6	5.9	5.4	6.4	5	5.4	5.8	8	40	6	2	7	1	5	100	2	40	1	20	0	0	2	10	1
24	62	3.2	1.3	2.9	1.2	1.95	2.1	1.8	2.4	1.5	1.4	2.8	2	1.6	7.6	7.8	7.4	8.2	7	9	6.6	7.4	7.4	5.7	5.7	5.7	4.7	6.7	4.8	6.6	4.6	6.8	10	50	6	4	7	3	5	100	2	40	1	20	2	40	0	0	0
25	67	3.8	1.2	5	1	2.1	2.5	1.7	2.6	1.6	2.2	2.8	2.4	1	6.25	7.1	5.4	6.6	5.9	7.6	6.6	5.6	5.2	5.5	5.4	5.6	5.3	5.7	5.2	5.6	5.4	5.8	9	45	6	3	7	2	4	80	3	60	2	40	0	0	1	5	1
26	70	3.1	1.3	3.8	1.3	1.9	2	1.8	2.3	1.5	1.8	2.2	2.4	1.2	5.8	6.2	5.4	7.1	4.5	6.8	5.6	7.4	3.4	5	4.9	5.1	4.9	5.1	4.6	5.2	5.2	5	7	35	4	3	5	2	2	40	3	60	2	40	0	0	0	0	0
27	65	3.3	1.2	3.4	1	2.6	2.8	2.4	2.8	2.4	2.6	3	2.6	2.2	7.05	7.2	6.9	7.4	6.7	7.4	7	7.4	6.4	6.25	6.3	6.2	6.3	6.2	6.2	6.4	6.4	6	15	75	8	7	10	5	5	100	5	100	3	60	2	40	4	20	2
28	69	4.7	1	4.5	1.2	2.05	2.3	1.8	2.3	1.8	2.4	2.2	2.4	1.2	8.9	9	8.8	8.9	8.9	9	9	8.8	8.8	7.6	7.5	7.7	8.3	6.9	8.4	6.6	8.2	7.2	9	45	7	2	5	4	4	80	1	20	3	60	1	20	1	5	1
29	72	2.9	1.3	2.9	1	2	2.1	1.9	2.2	1.8	2	2.2	2.2	1.6	6.2	6.2	6.2	6.3	6.1	6	6.4	6.6	5.8	4.25	4.7	3.8	4.6	3.9	4.6	4.8	4.6	3	15	75	9	6	8	7	4	80	4	80	5	100	2	40	3	15	2
30	70	3.8	2.7	4.5	1.2	1.85	2	1.7	2.1	1.6	1.8	2.2	2	1.4	7.4	7.9	6.9	7.7	7.1	7.8	8	7.6	6.2	4.3	4.4	4.2	4.1	4.5	4	4.8	4.2	4.2	12	60	8	4	7	5	5	100	2	40	3	60	2	40	0	0	0
31	62	4.4	1.3	5	1.4	1.9	2	1.8	2.3	1.5	1.6	2.4	2.2	1.4	6.5	6.6	6.4	7.2	5.8	7.4	5.8	7	5.8	1.7	2	1.4	2	1.4	2.2	1.8	1.8	1	7	35	5	2	4	3	3	60	1	20	2	40	1	20	1	5	1
32	61	3.8	1.3	3.3	1.1	1.95	2	1.9	2.2	1.7	1.6	2.4	2	1.8	6.55	6.4	6.7	6.7	6.4	6.6	6.2	6.8	6.6	5.1	5.2	5	5.6	4.6	5.2	5.2	6	4	12	60	5	7	9	3	4	80	5	100	1	20	2	40	10	50	4
33	65	3.8	1	4.2	1	2.65	2.9	2.4	2.7	2.6	2.8	3	2.4	2.4	7.65	8.2	7.1	7.7	7.6	8.6	7.8	6.8	7.4	7.3	7.4	7.2	6.9	7.7	7	7.8	6.8	7.6	10	50	6	4	5	5	3	60	2	40	3	60	2	40	2	10	1
34	69	2.4	1	2.2	1	2.95	3	2.9	2.9	3	3	3	2.8	3	8.4	8.6	8.2	8.2	8.6	8.6	8.6	7.8	8.6	1.25	1.2	1.3	1.2	1.3	1	1.4	1.4	1.2	14	70	8	6	6	8	4	80	2	40	4	80	4	80	1	5	1
35	68	3.3	1.1	3.3	1	2.7	3	2.4	2.6	2.8	3	3	2.2	2.6	6.85	7.3	6.4	6.5	7.2	7	7.6	6	6.8	4.95	4.9	5	4.7	5.2	4.4	5.4	5	5	18	90	9	9	10	8	5	100	5	100	4	80	4	80	4	20	3
	S3 Appendix. Experiment 2, ANOVA and t-test database
Note: The values related to the memory variable express sums. All other values, with the exception of "N", "Age group" and age, represent average values. Unless percentage is indicated.
[truncated: 21 more columns]
